# Supplementary material
Source: publisher figshare collection journal article supplement (https://gsapubs.figshare.com/ndownloader/files/26338585)
Supplement: Supplementary file 1 [file 26338585]

Yang, Z.-Y., et al., 2021, Subduction erosion and crustal material recycling indicated by adakites in central Tibet: Geology, v. 49, https://doi.org/10.1130/G48486.1

**Supplementary Data Tables**

Table 1. Zircon SIMS U-Pb dating results for the Kangqiong intrusions

Table 2. Whole-rock major and trace element compositions for the Kangqiong intrusions

Table 3. Whole-rock Sr and Nd isotopes for the Kangqiong intrusions

Table 4. Zircon O isotopic results for the Kangqiong intrusions

Table 5. Perpendicular distance between Jurassic-Cretaceous arc rocks and the BNS

**Table 1. Zircon SIMS U-Pb dating results for the Kangqiong intrusions**

| Sample | Ratios |  |  |  |  |  | Age/Ma |  |  |  | Contents |  |  | Measured |  |  | (1) |
| --- | --- | --- | --- | --- | --- | --- | --- | --- | --- | --- | --- | --- | --- | --- | --- | --- | --- |
| KQ02-2 | 207Pb | ± | 207Pb | ± | 206Pb | ± | 207Pb | ± | 206Pb | ± | U | Th | Th | 206Pb | f206 | Note | |
| Spot | 206Pb | % | 235U | % | 238U | % | 235U | % | 238U | % | ppm | ppm | U | 204Pb | % |
| #01 | 0.04950 | 1.67 | 0.16162 | 3.74 | 0.0237 | 3.34 | 152.1 | 5.3 | 150.9 | 5.0 | 152 | 55 | 0.361 | 4894 | {0.38} |  |  |
| #02 | 0.04994 | 1.61 | 0.16107 | 3.78 | 0.0234 | 3.42 | 151.6 | 5.3 | 149.1 | 5.0 | 225 | 88 | 0.390 | 7929 | {0.24} |  |  |
| #03 | 0.04853 | 0.97 | 0.16320 | 1.95 | 0.0244 | 1.70 | 153.5 | 2.8 | 155.3 | 2.6 | 598 | 229 | 0.383 | 14489 | {0.13} |  |  |
| #04 | 0.04968 | 1.33 | 0.16776 | 2.31 | 0.0245 | 1.88 | 157.5 | 3.4 | 156.0 | 2.9 | 217 | 102 | 0.468 | 3275 | {0.57} |  |  |
| #05 | 0.04914 | 0.86 | 0.16424 | 2.18 | 0.0242 | 2.01 | 154.4 | 3.1 | 154.4 | 3.1 | 515 | 229 | 0.445 | 22995 | 0.08 | *rim* |  |
| #06 | 0.04892 | 1.38 | 0.16328 | 2.75 | 0.0242 | 2.38 | 153.6 | 3.9 | 154.2 | 3.6 | 300 | 145 | 0.485 | 7134 | 0.26 | *interior* |  |
| #07 | 0.04744 | 2.21 | 0.15906 | 3.04 | 0.0243 | 2.09 | 149.9 | 4.3 | 154.9 | 3.2 | 164 | 62 | 0.380 | 3874 | 0.48 |  |  |
| #08 | 0.04945 | 1.78 | 0.16752 | 2.64 | 0.0246 | 1.95 | 157.3 | 3.9 | 156.5 | 3.0 | 149 | 58 | 0.386 | 8980 | * 0.21 |  |  |
| #09 | 0.05072 | 2.57 | 0.16834 | 3.38 | 0.0241 | 2.20 | 158.0 | 5.0 | 153.3 | 3.3 | 105 | 37 | 0.354 | 7446 | * 0.25 | *interior* |  |
| #10 | 0.04676 | 2.20 | 0.15602 | 2.88 | 0.0242 | 1.86 | 147.2 | 4.0 | 154.1 | 2.8 | 188 | 80 | 0.424 | 3343 | 0.56 | *rim* |  |
| #11 | *~~0.04983~~* | *~~1.36~~* | *~~0.15498~~* | *~~3.46~~* | *~~0.0226~~* | *~~3.18~~* | *~~146.3~~* | *~~4.7~~* | *~~143.8~~* | *~~4.5~~* | *~~321~~* | *~~122~~* | *~~0.382~~* | *~~10908~~* | *~~0.17~~* | *Muddy zircon CL* | |
| #12 | 0.04948 | 1.59 | 0.16303 | 5.79 | 0.0239 | 5.57 | 153.4 | 8.3 | 152.2 | 8.4 | 117 | 49 | 0.416 | 5912 | {0.32} | *interior* |  |
| #13 | ~~0.04593~~ | ~~4.18~~ | ~~0.15038~~ | ~~4.60~~ | ~~0.0237~~ | ~~1.93~~ | ~~142.2~~ | ~~6.1~~ | ~~151.3~~ | ~~2.9~~ | ~~232~~ | ~~98~~ | ~~0.421~~ | ~~972~~ | ~~1.92~~ | *~~rim~~* | *inclusion* |
| #14 | 0.04831 | 1.37 | 0.16551 | 2.26 | 0.0248 | 1.79 | 155.5 | 3.3 | 158.2 | 2.8 | 145 | 62 | 0.431 | 6490 | {0.29} |  |  |
| #15 | 0.04929 | 2.08 | 0.16792 | 3.07 | 0.0247 | 2.26 | 157.6 | 4.5 | 157.3 | 3.5 | 140 | 48 | 0.346 | 4251 | 0.44 | *interior* |  |
| #16 | 0.04609 | 2.45 | 0.15460 | 3.05 | 0.0243 | 1.82 | 146.0 | 4.2 | 154.9 | 2.8 | 348 | 139 | 0.400 | 3186 | 0.59 | *rim* |  |
| #19 | 0.04954 | 1.18 | 0.16325 | 2.37 | 0.0239 | 2.06 | 153.5 | 3.4 | 152.3 | 3.1 | 304 | 138 | 0.454 | 13277 | {0.14} |  |  |
| #20 | 0.04825 | 0.89 | 0.16121 | 2.41 | 0.0242 | 2.24 | 151.8 | 3.4 | 154.3 | 3.4 | 412 | 156 | 0.379 | 21181 | {0.09} | *interior* |  |
| #21 | *~~0.04875~~* | *~~0.92~~* | *~~0.14940~~* | *~~2.41~~* | *~~0.0222~~* | *~~2.23~~* | *~~141.4~~* | *~~3.2~~* | *~~141.7~~* | *~~3.1~~* | *~~536~~* | *~~228~~* | *~~0.425~~* | *~~15999~~* | *~~0.12~~* | *~~rim~~* | *inclusion* |
| #22 | 0.04909 | 1.37 | 0.15979 | 2.93 | 0.0236 | 2.59 | 150.5 | 4.1 | 150.4 | 3.9 | 209 | 102 | 0.486 | 14877 | * 0.13 |  |  |
|  |  |  |  |  |  |  |  |  |  |  |  |  |  |  |  | *Continued* | |

| Sample | Ratios |  |  |  |  |  | Age/Ma |  |  |  | Contents |  |  | Measured |  | (2) | |
| --- | --- | --- | --- | --- | --- | --- | --- | --- | --- | --- | --- | --- | --- | --- | --- | --- | --- |
| KQ01-3 | 207Pb | ± | 207Pb | ± | 206Pb | ± | 207Pb | ± | 206Pb | ± | U | Th | Th | 206Pb | f206 | Note | |
| Spot | 206Pb | % | 235U | % | 238U | % | 235U | % | 238U | % | ppm | ppm | U | 204Pb | % |
| #01 | ~~0.04699~~ | ~~9.24~~ | ~~0.14573~~ | ~~11.04~~ | ~~0.0225~~ | ~~6.03~~ | ~~138.1~~ | ~~14.4~~ | ~~143.4~~ | ~~8.6~~ | ~~132~~ | ~~55~~ | ~~0.417~~ | ~~1036~~ | ~~1.81~~ | *Large error* | |
| #02 | 0.04966 | 2.40 | 0.16631 | 4.14 | 0.0243 | 3.37 | 156.2 | 6.0 | 154.7 | 5.2 | 314 | 126 | 0.402 | 5574 | 0.34 |  |  |
| #03 | 0.04716 | 3.93 | 0.16019 | 4.36 | 0.0246 | 1.88 | 150.9 | 6.1 | 156.9 | 2.9 | 163 | 78 | 0.479 | 1152 | 1.62 |  |  |
| #04 | 0.04921 | 2.62 | 0.15599 | 3.44 | 0.0230 | 2.23 | 147.2 | 4.7 | 146.5 | 3.2 | 487 | 250 | 0.514 | 3344 | 0.56 |  |  |
| #05 | 0.04915 | 2.51 | 0.16907 | 3.97 | 0.0249 | 3.08 | 158.6 | 5.8 | 158.9 | 4.8 | 352 | 159 | 0.450 | 3699 | 0.51 |  |  |
| #06 | 0.04833 | 2.68 | 0.15912 | 3.56 | 0.0239 | 2.34 | 149.9 | 5.0 | 152.1 | 3.5 | 366 | 357 | 0.976 | 3009 | 0.62 |  |  |
| #07 | ~~0.05127~~ | ~~2.72~~ | ~~0.25375~~ | ~~3.82~~ | ~~0.0359~~ | ~~2.68~~ | ~~229.6~~ | ~~7.9~~ | ~~227.3~~ | ~~6.0~~ | ~~210~~ | ~~164~~ | ~~0.780~~ | ~~3047~~ | ~~0.61~~ | *Large error* | |
| #08 | 0.04896 | 2.47 | 0.16168 | 3.33 | 0.0240 | 2.23 | 152.2 | 4.7 | 152.6 | 3.4 | 335 | 146 | 0.434 | 3540 | 0.53 |  |  |
| #09 | 0.04802 | 1.44 | 0.15729 | 2.33 | 0.0238 | 1.83 | 148.3 | 3.2 | 151.4 | 2.7 | 415 | 469 | 1.130 | 4150 | 0.45 |  |  |
| #10 | 0.04850 | 2.42 | 0.16597 | 3.37 | 0.0248 | 2.33 | 155.9 | 4.9 | 158.0 | 3.6 | 350 | 154 | 0.441 | 3212 | 0.58 |  |  |
| #11 | 0.04591 | 5.39 | 0.14750 | 5.81 | 0.0233 | 2.17 | 139.7 | 7.6 | 148.5 | 3.2 | 175 | 169 | 0.962 | 1183 | 1.58 |  | |
| #12 | ~~0.05042~~ | ~~6.06~~ | ~~0.15541~~ | ~~7.58~~ | ~~0.0224~~ | ~~4.54~~ | ~~146.7~~ | ~~10.4~~ | ~~142.5~~ | ~~6.4~~ | ~~196~~ | ~~88~~ | ~~0.448~~ | ~~1679~~ | ~~1.11~~ | *Large error* | |
| #13 | 0.04917 | 1.04 | 0.16544 | 2.57 | 0.0244 | 2.35 | 155.5 | 3.7 | 155.4 | 3.6 | 541 | 261 | 0.482 | 11023 | 0.17 |  |  |
| #14 | 0.04835 | 1.35 | 0.16419 | 2.25 | 0.0246 | 1.81 | 154.4 | 3.2 | 156.9 | 2.8 | 400 | 195 | 0.486 | 13791 | 0.14 |  |  |
| #15 | 0.04975 | 3.65 | 0.15941 | 4.52 | 0.0232 | 2.67 | 150.2 | 6.3 | 148.1 | 3.9 | 94 | 65 | 0.696 | 2963 | 0.63 |  |  |
| **Standard Qinghu zircon** | |  |  |  |  |  |  |  |  |  |  |  |  |  |  |  |  |
| #01 | 0.04759 | 1.29 | 0.17118 | 2.31 | 0.0261 | 1.92 | 160.4 | 3.4 | 166.0 | 3.1 | 736 | 533 | 0.724 | 5077 | 0.37 |  |  |
| #02 | 0.05079 | 0.83 | 0.17262 | 2.94 | 0.0246 | 2.82 | 161.7 | 4.4 | 157.0 | 4.4 | 882 | 545 | 0.618 | 8115 | 0.23 |  |  |
| #03 | 0.04953 | 1.19 | 0.17203 | 2.19 | 0.0252 | 1.84 | 161.2 | 3.3 | 160.4 | 2.9 | 795 | 378 | 0.475 | 6828 | 0.27 |  |  |
| #04 | 0.05009 | 1.29 | 0.16639 | 2.55 | 0.0241 | 2.20 | 156.3 | 3.7 | 153.5 | 3.3 | 916 | 511 | 0.558 | 9618 | 0.19 |  |  |
| #06 | 0.04860 | 1.37 | 0.17175 | 2.37 | 0.0256 | 1.94 | 160.9 | 3.5 | 163.2 | 3.1 | 332 | 264 | 0.793 | 14155 | 0.13 |  |  |
| #07 | 0.04912 | 1.09 | 0.16528 | 2.98 | 0.0244 | 2.77 | 155.3 | 4.3 | 155.4 | 4.3 | 555 | 309 | 0.558 | 11877 | 0.16 |  |  |
|  |  |  |  |  |  |  |  |  |  |  |  |  |  |  |  | *Continued* | |

| Sample | Ratios |  |  |  |  |  | Age/Ma |  |  |  | Contents |  |  | Measured |  |  | (3) |
| --- | --- | --- | --- | --- | --- | --- | --- | --- | --- | --- | --- | --- | --- | --- | --- | --- | --- |
| Qinghu | 207Pb | ± | 207Pb | ± | 206Pb | ± | 207Pb | ± | 206Pb | ± | U | Th | Th | 206Pb | f206 | Note | |
| Spot | 206Pb | % | 235U | % | 238U | % | 235U | % | 238U | % | ppm | ppm | U | 204Pb | % |
| #08 | 0.04943 | 0.71 | 0.17196 | 2.17 | 0.0252 | 2.05 | 161.1 | 3.2 | 160.6 | 3.2 | 667 | 352 | 0.528 | 28212 | 0.07 |  |  |
| #09 | 0.04917 | 0.77 | 0.16886 | 1.89 | 0.0249 | 1.73 | 158.4 | 2.8 | 158.6 | 2.7 | 844 | 400 | 0.475 | 26271 | 0.07 |  |  |
| #10 | 0.05053 | 1.41 | 0.17452 | 2.18 | 0.0250 | 1.66 | 163.3 | 3.3 | 159.5 | 2.6 | 1068 | 681 | 0.637 | 44843 | 0.04 |  |  |
| #12 | 0.04942 | 0.64 | 0.17189 | 1.91 | 0.0252 | 1.80 | 161.1 | 2.9 | 160.6 | 2.9 | 842 | 352 | 0.418 | 34855 | 0.05 |  |  |
| #13 | 0.04897 | 0.66 | 0.17158 | 1.98 | 0.0254 | 1.87 | 160.8 | 2.9 | 161.8 | 3.0 | 852 | 323 | 0.379 | 23138 | 0.08 |  |  |
| #14 | 0.04933 | 0.69 | 0.16988 | 1.87 | 0.0250 | 1.74 | 159.3 | 2.8 | 159.0 | 2.7 | 1075 | 603 | 0.561 | 33353 | 0.06 |  |  |

f206 (%) is the amount of common 206Pb, estimated from measured 204Pb.

Data marked with delete line are excluded for age calculation and plots.

**Table 2. Whole-rock major and trace element compositions for the Kangqiong intrusions**

1. Major elements (XRF) in wt.%

| Sample | KQ01-2 | KQ01-3 | KQ01-6 | KQ01-1 | KQ01-2C | KQ01-4 | KQ01-5 | KQ01-7 | KQ02-1 |
| --- | --- | --- | --- | --- | --- | --- | --- | --- | --- |
| Latitude/N |  | 32°10.78′ |  |  |  |  |  |  |  |
| Longitude/E |  | 88°10.8′ |  |  |  |  |  |  |  |
| SiO2 | 73.26 | 74.43 | 72.50 | 64.98 | 67.70 | 67.90 | 65.03 | 65.45 | 64.33 |
| TiO2 | 0.245 | 0.164 | 0.226 | 0.568 | 0.433 | 0.402 | 0.575 | 0.572 | 0.585 |
| Al2O3 | 13.31 | 13.40 | 13.24 | 15.93 | 15.79 | 15.38 | 15.79 | 15.32 | 15.18 |
| Fe2O3T | 1.40 | 1.30 | 1.83 | 3.70 | 2.53 | 4.11 | 3.57 | 3.74 | 3.06 |
| MnO | 0.072 | 0.049 | 0.069 | 0.155 | 0.084 | 0.113 | 0.072 | 0.084 | 0.071 |
| MgO | 0.76 | 0.49 | 0.73 | 2.45 | 1.70 | 1.47 | 2.61 | 2.20 | 3.22 |
| CaO | 2.24 | 1.45 | 1.70 | 4.87 | 4.07 | 3.58 | 4.61 | 3.85 | 5.39 |
| Na2O | 3.53 | 3.73 | 3.20 | 4.62 | 5.16 | 4.87 | 4.60 | 4.53 | 5.55 |
| K2O | 4.40 | 4.24 | 5.93 | 2.05 | 1.86 | 1.57 | 1.99 | 2.86 | 2.10 |
| P2O5 | 0.045 | 0.032 | 0.050 | 0.109 | 0.098 | 0.100 | 0.120 | 0.110 | 0.133 |
| LOI | 0.166 | 0.183 | 0.189 | 0.469 | 0.294 | 0.357 | 0.542 | 0.622 | 0.432 |
| Total | 99.42 | 99.46 | 99.66 | 99.90 | 99.71 | 99.84 | 99.52 | 99.33 | 100.04 |
| Mg# | 52 | 43 | 44 | 57 | 57 | 41 | 59 | 54 | 68 |

| Sample | KQ02-2 | KQ02-3 | KQ02-4 | KQ02-5 | KQ02-6 | KQ02-7 | KQ02-8 | KQ02-9 |  |
| --- | --- | --- | --- | --- | --- | --- | --- | --- | --- |
| Latitude/N | 32°10.78′ |  |  |  |  |  |  |  |  |
| Longitude/E | 88°10.88′ |  |  |  |  |  |  |  |  |
| SiO2 | 64.67 | 65.20 | 63.79 | 64.47 | 64.77 | 64.99 | 65.05 | 64.88 |  |
| TiO2 | 0.579 | 0.586 | 0.569 | 0.567 | 0.583 | 0.564 | 0.570 | 0.573 |  |
| Al2O3 | 15.72 | 15.98 | 15.60 | 15.79 | 15.71 | 15.52 | 15.65 | 15.67 |  |
| Fe2O3T | 2.94 | 2.67 | 2.75 | 2.75 | 3.22 | 2.52 | 2.86 | 2.62 |  |
| MnO | 0.068 | 0.053 | 0.078 | 0.086 | 0.079 | 0.055 | 0.087 | 0.061 |  |
| MgO | 2.98 | 2.94 | 2.54 | 2.97 | 2.99 | 2.75 | 2.92 | 2.89 |  |
| CaO | 5.12 | 5.29 | 4.87 | 5.40 | 5.32 | 4.78 | 4.82 | 5.27 |  |
| Na2O | 5.14 | 4.69 | 7.02 | 5.23 | 4.29 | 5.17 | 5.08 | 5.11 |  |
| K2O | 2.14 | 2.10 | 2.03 | 2.03 | 2.26 | 2.58 | 2.27 | 2.32 |  |
| P2O5 | 0.137 | 0.136 | 0.119 | 0.133 | 0.125 | 0.127 | 0.129 | 0.130 |  |
| LOI | 0.353 | 0.380 | 0.532 | 0.336 | 0.353 | 0.325 | 0.551 | 0.345 |  |
| Total | 99.85 | 100.03 | 99.90 | 99.76 | 99.70 | 99.38 | 99.99 | 99.86 |  |
| Mg# | 67 | 69 | 65 | 68 | 65 | 68 | 67 | 69 |  |

**Notes**: Mg# = 100 x Mg/(Mg+Fe2+) molar;

Fe2O3T, all Fe as Fe2O3; analyses listed are not normalized to 100% total.

1. Trace elements (LA-ICP-MS) compositions in ppm (1)

| Sample | KQ01-2 | KQ01-3 | KQ01-6 | KQ01-1 | KQ01-2C | KQ01-4 | KQ01-5 | KQ01-7 | KQ02-1 |
| --- | --- | --- | --- | --- | --- | --- | --- | --- | --- |
| Sc | 3.79 | 2.85 | 3.51 | 9.06 | 6.39 | 5.88 | 8.96 | 7.65 | 9.02 |
| V | 18.4 | 11.7 | 16.1 | 58.9 | 38.1 | 40.6 | 56.0 | 49.3 | 58.1 |
| Cr | 37.7 | 31.5 | 40.7 | 78.3 | 60.9 | 71.6 | 82.1 | 63.6 | 101 |
| Mn | 547 | 358 | 524 | 1329 | 627 | 805 | 575 | 658 | 539 |
| Co | 2.56 | 2.54 | 3.63 | 13.53 | 5.23 | 9.94 | 12.5 | 9.21 | 7.89 |
| Ni | 9.82 | 9.51 | 11.0 | 46.8 | 27.2 | 28.0 | 51.4 | 37.0 | 55.1 |
| Cu | 10.5 | 7.6 | 14.4 | 11.0 | 9.81 | 41.7 | 11.0 | 7.98 | 13.6 |
| Zn | 25.4 | 18.7 | 24.6 | 77.2 | 34.0 | 67.7 | 42.0 | 35.0 | 37.7 |
| Ga | 13.2 | 13.3 | 13.1 | 18.6 | 16.0 | 16.0 | 17.6 | 16.1 | 15.8 |
| Ge | 1.12 | 1.02 | 1.08 | 1.47 | 1.13 | 1.40 | 1.30 | 1.41 | 1.41 |
| Rb | 167 | 160 | 185 | 62.1 | 50.5 | 55.6 | 73.8 | 90.2 | 57.1 |
| Sr | 328 | 223 | 328 | 627 | 573 | 460 | 567 | 529 | 909 |
| Y | 11.8 | 9.24 | 10.7 | 12.9 | 10.3 | 9.5 | 13.1 | 13.3 | 12.9 |
| Zr | 82.3 | 74.7 | 94.8 | 126 | 108 | 111 | 132 | 134 | 138 |
| Nb | 11.6 | 8.68 | 10.0 | 11.5 | 9.31 | 8.52 | 10.98 | 13.43 | 10.43 |
| Cs | 2.13 | 2.42 | 1.90 | 1.43 | 1.02 | 1.89 | 1.55 | 2.10 | 1.02 |
| Ba | 402 | 325 | 444 | 654 | 460 | 421 | 569 | 546 | 434 |
| La | 15.7 | 20.0 | 16.7 | 14.8 | 15.9 | 21.9 | 12.7 | 20.7 | 12.1 |
| Ce | 31.8 | 33.4 | 30.9 | 28.4 | 29.4 | 38.5 | 24.3 | 34.4 | 24.8 |
| Pr | 3.45 | 3.28 | 3.24 | 3.25 | 3.30 | 4.25 | 2.92 | 3.67 | 3.04 |
| Nd | 11.4 | 10.4 | 10.9 | 12.7 | 12.0 | 14.7 | 11.5 | 13.5 | 12.1 |
| Sm | 2.12 | 1.74 | 1.99 | 2.59 | 2.32 | 2.56 | 2.51 | 2.60 | 2.65 |
| Eu | 0.337 | 0.325 | 0.388 | 0.925 | 0.692 | 0.664 | 0.876 | 0.808 | 0.742 |
| Gd | 1.94 | 1.62 | 1.85 | 2.49 | 2.16 | 2.24 | 2.47 | 2.51 | 2.54 |
| Tb | 0.305 | 0.238 | 0.286 | 0.382 | 0.323 | 0.302 | 0.391 | 0.38 | 0.394 |
| Dy | 1.84 | 1.44 | 1.73 | 2.24 | 1.79 | 1.70 | 2.27 | 2.24 | 2.27 |
| Ho | 0.388 | 0.303 | 0.357 | 0.442 | 0.356 | 0.332 | 0.463 | 0.454 | 0.453 |
| Er | 1.13 | 0.92 | 1.03 | 1.22 | 0.98 | 0.90 | 1.24 | 1.25 | 1.24 |
| Tm | 0.184 | 0.148 | 0.16 | 0.173 | 0.145 | 0.133 | 0.181 | 0.188 | 0.176 |
| Yb | 1.29 | 1.05 | 1.09 | 1.15 | 0.95 | 0.89 | 1.19 | 1.26 | 1.15 |
| Lu | 0.212 | 0.171 | 0.173 | 0.181 | 0.145 | 0.139 | 0.187 | 0.199 | 0.179 |
| Hf | 2.75 | 2.51 | 3.05 | 3.19 | 2.82 | 2.95 | 3.36 | 3.46 | 3.36 |
| Ta | 1.33 | 1.06 | 1.21 | 0.794 | 0.719 | 0.718 | 0.786 | 1.04 | 0.724 |
| Pb | 14.4 | 11.1 | 11.5 | 27.5 | 10.0 | 40.7 | 11.2 | 8.38 | 6.74 |
| Th | 21.9 | 23.1 | 13. 4 | 5.38 | 6.07 | 6.46 | 5.28 | 8.80 | 5.15 |
| U | 2.344 | 2.315 | 2.281 | 0.994 | 0.952 | 0.909 | 0.984 | 1.19 | 1.32 |
| Sr/Y | 27.85 | 24.18 | 30.69 | 49 | 55 | 48 | 43 | 40 | 71 |
| (La/Yb)N | 8.73 | 13.68 | 11.05 | 9.22 | 12.05 | 17.69 | 7.64 | 11.83 | 7.52 |
| Eu/Eu* | 0.51 | 0.59 | 0.62 | 1.11 | 0.95 | 0.85 | 1.08 | 0.97 | 0.87 |
| Tzr (oC) | 722 | 725 | 730 | 732 | 729 | 740 | 739 | 742 | 711 |

*Continued*

(2)

| Sample | KQ02-2 | KQ02-3 | KQ02-4 | KQ02-5 | KQ02-6 | KQ02-7 | KQ02-8 | KQ02-9 |  |
| --- | --- | --- | --- | --- | --- | --- | --- | --- | --- |
| Sc | 8.69 | 8.66 | 8.59 | 8.77 | 8.46 | 8.79 | 8.56 | 8.63 |  |
| V | 56.1 | 55.4 | 54.3 | 54.8 | 54.2 | 53.1 | 54.2 | 53.5 |  |
| Cr | 117 | 98.0 | 110 | 117 | 109 | 95.5 | 86.2 | 100 |  |
| Mn | 543 | 407 | 588 | 652 | 583 | 413 | 649 | 472 |  |
| Co | 8.89 | 7.19 | 7.27 | 7.80 | 7.74 | 6.71 | 7.70 | 7.34 |  |
| Ni | 53.5 | 45.3 | 51.1 | 55.3 | 47.9 | 51.1 | 45.7 | 44.4 |  |
| Cu | 14.3 | 18.6 | 10.3 | 15.7 | 24.6 | 11.1 | 11.0 | 17.0 |  |
| Zn | 33.3 | 29.2 | 30.9 | 35.9 | 31.6 | 30.2 | 37.4 | 32.0 |  |
| Ga | 17.1 | 16.4 | 16.6 | 16.5 | 15.9 | 15.8 | 15.9 | 15.9 |  |
| Ge | 1.29 | 1.20 | 1.27 | 1.16 | 1.29 | 1.10 | 1.22 | 1.14 |  |
| Rb | 70.8 | 60.4 | 59.8 | 55.2 | 65.0 | 69.1 | 66.8 | 61.0 |  |
| Sr | 1097 | 974 | 636 | 824 | 720 | 877 | 795 | 868 |  |
| Y | 12.9 | 12.7 | 12.4 | 12.7 | 12.7 | 13.0 | 12.6 | 12.7 |  |
| Zr | 132 | 133 | 122 | 128 | 129 | 121 | 122 | 129 |  |
| Nb | 11.0 | 11.0 | 10.8 | 10.6 | 10.7 | 10.9 | 10.8 | 10.7 |  |
| Cs | 1.11 | 1.22 | 1.23 | 0.718 | 1.09 | 0.830 | 1.14 | 0.784 |  |
| Ba | 494 | 562 | 477 | 461 | 551 | 525 | 507 | 480 |  |
| La | 13.0 | 15.2 | 14.0 | 13.5 | 16.2 | 9.50 | 14.9 | 12.7 |  |
| Ce | 26.3 | 28.7 | 29.6 | 26.6 | 30.1 | 21.2 | 29.4 | 25.1 |  |
| Pr | 3.18 | 3.28 | 3.43 | 3.17 | 3.47 | 2.81 | 3.35 | 3.11 |  |
| Nd | 12.2 | 12.7 | 13.0 | 12.4 | 13.2 | 11.7 | 12.8 | 12.1 |  |
| Sm | 2.64 | 2.63 | 2.59 | 2.58 | 2.65 | 2.63 | 2.63 | 2.57 |  |
| Eu | 0.809 | 0.787 | 0.809 | 0.803 | 0.791 | 0.741 | 0.788 | 0.776 |  |
| Gd | 2.49 | 2.55 | 2.54 | 2.53 | 2.60 | 2.49 | 2.53 | 2.43 |  |
| Tb | 0.385 | 0.388 | 0.383 | 0.379 | 0.385 | 0.390 | 0.378 | 0.379 |  |
| Dy | 2.25 | 2.23 | 2.22 | 2.25 | 2.28 | 2.30 | 2.26 | 2.23 |  |
| Ho | 0.446 | 0.444 | 0.436 | 0.445 | 0.446 | 0.452 | 0.445 | 0.441 |  |
| Er | 1.22 | 1.21 | 1.21 | 1.20 | 1.22 | 1.23 | 1.22 | 1.20 |  |
| Tm | 0.174 | 0.176 | 0.173 | 0.175 | 0.172 | 0.178 | 0.177 | 0.173 |  |
| Yb | 1.16 | 1.14 | 1.13 | 1.10 | 1.15 | 1.17 | 1.14 | 1.12 |  |
| Lu | 0.18 | 0.181 | 0.173 | 0.177 | 0.18 | 0.18 | 0.18 | 0.176 |  |
| Hf | 3.27 | 3.32 | 3.11 | 3.14 | 3.22 | 3.08 | 3.06 | 3.21 |  |
| Ta | 0.781 | 0.778 | 0.774 | 0.735 | 0.747 | 0.784 | 0.767 | 0.746 |  |
| Pb | 6.91 | 4.76 | 5.70 | 7.10 | 6.07 | 5.91 | 15.2 | 5.7 |  |
| Th | 5.70 | 5.61 | 5.15 | 5.57 | 5.30 | 5.92 | 5.56 | 5.53 |  |
| U | 1.37 | 1.25 | 1.29 | 1.29 | 1.20 | 1.32 | 1.28 | 1.25 |  |
| Sr/Y | 85 | 77 | 51 | 65 | 57 | 68 | 63 | 68 |  |
| (La/Yb)N | 7.98 | 9.56 | 8.90 | 8.84 | 10.11 | 5.82 | 9.34 | 8.11 |  |
| Eu/Eu* | 0.97 | 0.93 | 0.96 | 0.96 | 0.92 | 0.89 | 0.93 | 0.95 |  |
| Tzr (oC) | 722 | 730 | 694 | 716 | 728 | 716 | 720 | 717 |  |

**Note**: TZr (oC), zircon saturation temperature based on the whole-rock Zr thermometer of Watson and Harrison (1983)

Watson, E. B., and Harrison, T. M., 1983, Zircon saturation revisited: temperature and composition effects in a variety of crustal magma types: Earth and Planetary Science Letters, v. 64, no. 2, p. 295-304.

**Table 3. Whole-rock Sr and Nd isotopes for** the Kangqiong intrusions

| Sample | KQ01-2 | KQ01-3 | KQ01-1 | KQ01-4 | KQ01-7 | KQ02-2 | KQ02-4 | KQ02-9 |
| --- | --- | --- | --- | --- | --- | --- | --- | --- |
| Rb | 167.1 | 160.1 | 62.05 | 55.62 | 90.19 | 70.84 | 59.76 | 60.95 |
| Sr | 327.8 | 223.4 | 627.1 | 460 | 528.8 | 1096.5 | 635.7 | 867.6 |
| 87Rb/86Sr | 1.47606699 | 2.07513679 | 0.28651249 | 0.35011581 | 0.49386188 | 0.18707187 | 0.272205531 | 0.20341957 |
| 87Sr/86Sr | 0.709635 | 0.710719 | 0.706136 | 0.705777 | 0.707230 | 0.707585 | 0.706799 | 0.707386 |
| 2 SE | 0.000008 | 0.000009 | 0.000007 | 0.000008 | 0.000009 | 0.000008 | 0.000008 | 0.000008 |
| (87Sr/86Sr)i | 0.70640 | 0.70618 | 0.70551 | 0.70501 | 0.70615 | 0.70718 | 0.70620 | 0.70694 |
|  |  |  |  |  |  |  |  |  |
| Sm | 2.12 | 1.743 | 2.588 | 2.559 | 2.604 | 2.637 | 2.593 | 2.57 |
| Nd | 11.42 | 10.38 | 12.67 | 14.69 | 13.48 | 12.19 | 13.01 | 12.12 |
| 147Sm/144Nd s | 0.11223005 | 0.10151716 | 0.12348866 | 0.10531443 | 0.11678592 | 0.13078136 | 0.12049378 | 0.12819465 |
| (143Nd/144Nd)m | 0.51253 | 0.51247 | 0.512638 | 0.512646 | 0.512517 | 0.512625 | 0.5126019 | 0.512604 |
| 2 SE | 0.000005 | 0.000005 | 0.000005 | 0.000004 | 0.000003 | 0.000005 | 0.000004 | 0.000006 |
| (143Nd/144Nd)I | 0.512414 | 0.512368 | 0.512514 | 0.512539 | 0.512399 | 0.512493 | 0.512481 | 0.512475 |
| εNd(t) | -0.50 | -1.40 | 1.44 | 1.95 | -0.79 | 1.05 | 0.79 | 0.68 |
| TDM2 /Ma | 986 | 1060 | 828 | 787 | 996 | 860 | 881 | 890 |

**Note**: εNd(t) values are calculated at t = 154 Ma; (143Nd/144Nd)m is the measured values of the samples.

**Table 4. Zircon** O isotopic results for the Kangqiong intrusions

| Sample | **KQ02-2** | | |  | Sample | **KQ01-3** | | (1) |
| --- | --- | --- | --- | --- | --- | --- | --- | --- |
| Spot | Delta O  (‰) | 2SE | Note |  | Spot | Delta O  (‰) | 2SE | Note |
| @01 | 5.90 | 0.20 |  |  | @01 | 5.80 | 0.28 |  |
| @09 | 5.90 | 0.18 |  |  | @02 | 5.94 | 0.35 |  |
| @10 | 5.51 | 0.14 |  |  | @03 | 5.34 | 0.28 |  |
| @11 | 5.84 | 0.21 |  |  | @04 | 5.51 | 0.19 |  |
| @12 | 5.46 | 0.26 |  |  | @05 | 4.04 | 0.24 |  |
| @13 | 5.67 | 0.21 |  |  | @06 | 6.21 | 0.26 |  |
| @14 | 5.89 | 0.15 |  |  | @07 | 5.59 | 0.26 |  |
| @15 | 5.79 | 0.19 |  |  | @08 | 4.52 | 0.16 |  |
| @16 | 4.61 | 0.17 |  |  | @09 | 5.41 | 0.23 |  |
| @17 | 5.45 | 0.23 |  |  | @10 | 5.45 | 0.22 |  |
| @18 | *3.63* | *0.19* | *Muddy CL* |  | @11 | *7.65* | *0.14* | *Muddy CL* |
| @19 | 5.01 | 0.12 |  |  | @12 | 4.76 | 0.21 |  |
| @2 | 6.06 | 0.19 |  |  | @13 | *1.83* | *0.25* | *inclusion* |
| @20 | 5.47 | 0.19 |  |  | @14 | 4.61 | 0.20 |  |
| @21 | 5.14 | 0.20 |  |  | @15 | 5.85 | 0.27 |  |
| @22 | 5.27 | 0.17 |  |  | @16 | 6.04 | 0.22 |  |
| @23 | 5.85 | 0.13 |  |  |  |  |  |  |
| @24 | 5.58 | 0.16 |  |  |  |  |  |  |
| @25 | 5.67 | 0.24 |  |  |  |  |  |  |
| @26 | 5.81 | 0.19 |  |  |  |  |  |  |
| @27 | 5.62 | 0.22 |  |  |  |  |  |  |
| @28 | 5.99 | 0.21 |  |  |  |  |  |  |
| @29 | 5.79 | 0.21 |  |  |  |  |  |  |
| @3 | 5.60 | 0.16 |  |  |  |  |  |  |
| @30 | 5.87 | 0.17 |  |  |  |  |  |  |
| @4 | 5.98 | 0.16 |  |  |  |  |  |  |
| @5 | 5.23 | 0.23 |  |  |  |  |  |  |
| @6 | 5.20 | 0.19 |  |  |  |  |  |  |
| @7 | 6.17 | 0.18 |  |  |  |  |  |  |

*Continued*

| Sample | Standard reference **Penglai** | | | | Sample | | Standard reference **Qinghu** (2) | | |
| --- | --- | --- | --- | --- | --- | --- | --- | --- | --- |
| Spot | Delta O  (‰) | 2SE | Note |  | | Spot | Delta O  (‰) | 2SE | Note |
| #01 | 5.21 | 0.29 |  |  | | #01 | 5.04 | 0.23 |  |
| #02 | 5.42 | 0.19 |  |  | | #02 | 5.07 | 0.24 |  |
| #03 | 5.09 | 0.25 |  |  | | #03 | 4.92 | 0.28 |  |
| #04 | 5.28 | 0.25 |  |  | | #04 | 5.34 | 0.25 |  |
| #05 | 5.22 | 0.22 |  |  | | #05 | 5.13 | 0.36 |  |
| #06 | 5.30 | 0.38 |  |  | | #06 | 5.83 | 0.20 |  |
| #07 | 5.23 | 0.28 |  |  | | #07 | 5.63 | 0.17 |  |
| #08 | 5.21 | 0.29 |  |  | | #08 | 5.45 | 0.15 |  |
| #09 | 5.51 | 0.17 |  |  | | #09 | 5.19 | 0.21 |  |
| #10 | 5.20 | 0.26 |  |  | | #10 | 5.53 | 0.18 |  |
| #11 | 5.45 | 0.24 |  |  | |  |  |  |  |
| #12 | 5.20 | 0.20 |  |  | |  |  |  |  |
| #13 | 5.43 | 0.14 |  |  | |  |  |  |  |
| #14 | 5.44 | 0.19 |  |  | |  |  |  |  |
| #15 | 5.26 | 0.22 |  |  | |  |  |  |  |
| #16 | 4.92 | 0.19 |  |  | |  |  |  |  |
| #17 | 4.83 | 0.24 |  |  | |  |  |  |  |
| #18 | 5.26 | 0.11 |  |  | |  |  |  |  |

**Note**: The italic data are excluded from plots and calculation of mean value.

**Table 5. Perpendicular distance between Jurassic-Cretaceous arc rocks and the BNS**  (1)

| Pluton | Sample | Latitude  N/o | Longitude  E/o | Rock type | Age / Ma | Distance / km | Reference |
| --- | --- | --- | --- | --- | --- | --- | --- |
| Hongjishan pluton | TL22 | 34.49663 | 84.00396 | granite porphyry | 155 | 336 | 18 |
| Eastern Bangong Co | 08014B | 33.56483 | 79.939167 | Quartz-diorite | 163.3 | 8 | 12 |
| Northen Rena Co | 08094A | 32.78433 | 84.204 | Q-diorite | 150.1 | 74 | 12 |
| Northen Rena Co | 08094B | 32.7875 | 84.2005 | Q-diorite | 150.5 | 75 | 12 |
| Ouling pluton NW Rena Co | 08095C | 32.88637 | 84.08058 | Granodiorite | 151.3 | 80 | 12 |
| Ouling pluton NW Rena Co | 08095D | 32.89287 | 84.08393 | Granodiorite | 160.5 | 83 | 12 |
| Larelaxin pluton West | 08010B | 33.54738 | 80.05262 | Biotite granite | 168.1 | 18 | 11 |
| Larelaxin pluton Middle S of Kayi Co | 08012D | 33.5383 | 80.12892 | Biotite granite | 168.4 | 21 | 11 |
| NE Bumu Co | TW202-10 | 33.59028 | 81.79608 | Granodiorite | 157.4 | 63 | 1 |
| NE Bumu Co | TW204-10 | 33.60412 | 81.84365 | Monzogranite | 151.4 | 64 | 1 |
| N Bumu Co Fuye pluton | D1046 | 33.36437 | 81.56667 | Diorite | 120 | 33 | 21 |
| Caima pluton | ZZ54-2 | 33.37795 | 80.5986 | Bt-monzogranite | 165.1 | 16 | 20 |
| Caima pluton middle | 10FY13 | 33.44742 | 80.5617 | monzogranite | 169 | 13.9 | 9 |
| Caima pluton SE Changmu Co | 10FY05 | 33.46995 | 80.43302 | Diorite dike | 159 | 21 | 9 |
| Larelaxin M | 10FY23 | 33.5403 | 80.1134 | Syenogranite | 162 | 18 | 9 |
| Larelaxin pluton East of Bangong Co | 10FY36 | 33.56352 | 79.94143 | Q-diorite | 160.2 | 13 | 9 |
| Caima pluton S Kayi Co | 10FY27 | 33.5403 | 80.1134 | Syenogranite | 160.3 | 18 | 9 |
| Caima pluton SE Changmu Co | 10FY07 | 33.46995 | 80.43302 | Granodiorite | 159.8 | 21 | 9 |
| Caima pluton north of Aiyong Co | 10FY16 | 33.38325 | 80.5617 | Granodiorite | 162.5 | 15 | 9 |
| Qingcaoshan | QCS-B3 | 33.2333 | 82.8972 | Granodiotite porphyry | 118 | 70 | 22 |
| Qingcaoshan | QCS-B9 | 33.2333 | 82.8972 | Granodiorite | 131 | 70 | 22 |
| Qingcaoshan | QCS14 | 33.2333 | 82.8972 | Quartz-monzonite porphyry | 122 | 70 | 13 |
| E Liqunshan | BH100 | 33.67028 | 83.74333 | Granite | 154 | 131 | 5 |
| E Liqunshan | BH99 | 33.62972 | 83.73694 | Granite | 161.5 | 120 | 5 |
| SE Liqunshan | BH98 | 33.54028 | 83.63944 | Granite | 161.4 | 109 | 5 |

*Continued*

**Table 5**. (2)

| Pluton | Sample | Latitude  N/o | Longitude  E/o | Rock type | Age / Ma | Distance / km | Reference |
| --- | --- | --- | --- | --- | --- | --- | --- |
| South of Liqunshan | BH94 | 33.44472 | 83.51 | Granite | 157 | 93 | 5 |
| Dong Co granodiorite | T2 | 32.34863 | 84.689 | Granodiorite | 160 | 35 | 2 |
| North of Qingcaochan | QCSB01 | 33.3041 | 82.99075 | Granodiorite | 154.8 | 75 | 17 |
| Tutong puton N Caima | B-5 | 33.5917 | 80.7061 | Quartz-monzonite | 163.3 | 42 | 5 |
| Larelaxin Pluton Songmu stock | BH-7 | 33.5717 | 79.9772 | Bt-Granite | 162.5 | 16 | 5 |
| Larelaxin Pluton Middle stock | BH-10 | 33.5403 | 80.115 | Coarse-grained granite | 162.3 | 21 | 5 |
| Larelaxin Pluton West small stock | BH-13 | 33.5586 | 79.9497 | Granodiorite | 163.6 | 13 | 5 |
| Larelaxin west main pluton | BH-15-2 | 33.55 | 79.9711 | Granodiorite porphyry | 161.2 | 12 | 5 |
| Larelaxin main pluton | BH-17 | 33.5536 | 80.0208 | Granite | 163.2 | 17.5 | 5 |
| Caima pluton west | BH18-1 | 33.4547 | 80.4683 | Diorite | 168.4 | 20 | 5 |
| Caima pluton west | BH18-2 | 33.4547 | 80.4683 | Granite | 169.3 | 18 | 5 |
| North of Rena Co | BH-79 | 32.79872 | 84.1972 | Diorite | 153.1 | 74 | 5 |
| Ouling pluton | BH-80 | 32.89333 | 84.08333 | Granodiorite | 150.1 | 84 | 5 |
| North of Chamu Co | BH-82 | 33.27055 | 82.97055 | Diorite | 160.3 | 75 | 5 |
| North of Leimachahe | BH86-1 | 33.30611 | 83.15333 | Diorite | 160.7 | 75.2 | 5 |
| NE of Numamerge East of Liqunshan | BH90-1 | 33.67083 | 82.8 | Granodiorite | 164 | 130 | 5 |
| East of Dalonggou | BH-92 | 33.44833 | 82.59861 | Granodiorite | 165.7 | 84 | 5 |
| North of Qingcaochan | BH-93 | 33.29944 | 82.89167 | Granodiorite | 164.5 | 76 | 5 |
| South of Labu Co | DT14 | 32.90633 | 83.8552 | Granodiorite | 160.2 | 46 | 15 |
| South of Labu Co | DT30 | 32.83333 | 83.91193 | Granodiorite | 168.9 | 42 | 15 |
| South of Labu Co | DT17 | 32.84372 | 83.88288 | Diorite | 156.1 | 42.5 | 15 |
| South of Labu Co | GZ33-3 | 32.84467 | 83.87993 | Q-diorite | 157.5 | 41 | 19 |
| Chajia pluton | D0205-N | 32.50627 | 84.40688 | Granodiorite | 148 | 47 | 19 |

*Continued*

**Table 5**. (3)

| Pluton | Sample | Latitude  N/o | Longitude  E/o | Rock type | Age / Ma | Distance / km | Reference |
| --- | --- | --- | --- | --- | --- | --- | --- |
| Ouling pluton NW Rena Co | 13GZ03 | 32.89333 | 84.08333 | Granodiorite | 151.7 | 84 | 3 |
| E of Rena Co | 13GZ20-1 | 32.723 | 84.173 | Granodiorite porphyry | 111.7 | 63 | 3 |
| E of Rena Co | 13GZ25 | 32.769 | 84.021 | Granodiorite | 148.1 | 70 | 3 |
| N of Rena Co | 13GZ09-1 | 32.79 | 84.204 | Diorite | 153 | 78 | 3 |
| N of Rena Co | 13GZ11-1 | 32.777 | 84.199 | Diorite | 152.7 | 74 | 3 |
| E of Rena Co | 13GZ15-1 | 32.708 | 84.234 | Granodiorite | 148.4 | 62 | 3 |
| Ouling pluton NW Rena Co | 13GZ02 | 32.889 | 84.084 | Granodiorite | 151.7 | 83 | 3 |
| Duobuza | 10DB11 | 32.83863 | 83.4324 | Diabase | 157.6 | 24 | 8 |
| Jipu Sandui pluton | BH-4 | 33.82222 | 79.84806 | Granite | 116.1 | 24 | 5 |
| W Tuanjiedaban | BH-83-1 | 33.22667 | 83.19083 | Granodiorite | 120 | 67 | 5 |
| Shamule pluton | BH-87 | 33.42389 | 83.105 | Granite | 115 | 84 | 5 |
| NE Kahu Co | BH-89 | 33.41945 | 83.04528 | Granite | 117 | 83.6 | 5 |
| Saijiao pluton | SJ-1 | 32.82083 | 83.61028 | Diorte | 123.1 | 25 | 5 |
| Duobuza deposit area | ZK2304 | 32.83333 | 83.43333 | granodiorite porphyry | 121.5 | 23 | 23 |
| Duobuza deposit area | Dbzj2-1 | 32.84248 | 83.43652 | Ore-bearing granodiorite porphyry | 117 | 25 | 6 |
| Duobuza deposit area Bolong | DW2-8 | 32.8065 | 83.39283 | Ore-bearing granodiorite porphyry | 120.9 | 24 | 6 |
| Kangri pluton near Dongqiao | 09019-2 | 32.05883 | 90.5595 | Granite | 115.3 | 24 | 12 |
| Xiabie granite | Kapp07-719 | 32.22 | 87.22 | Granite | 118 | 10 | 4 |
| Xiabie granite | 15ZB118-7 | 32.23312 | 87.21883 | Granite | 120 | 10 | 16 |
| Jiarebu Co granite | 16NM11-1 | 32.24925 | 87.72323 | Granite | 120 | 24 | 16 |
| Duolong Cu-Au deposit | DD-8 | 32.835 | 83.43 | Granodiorite porphyry | 117.4 | 23 | 7 |
| Duolong Cu-Au deposit | BLZK15502-553 | 32.8 | 83.393 | Granodiorite porphyry | 118.5 | 20 | 7 |
| Duolong Cu-Au deposit | BLZK17103-332 | 32.8 | 83.393 | Granodiorite porphyry | 118.5 | 20 | 7 |
| Duolong Cu-Au deposit | BLZK17103-465 | 32.8 | 83.393 | Q-diorite porpyry | 118.6 | 20 | 7 |

*Continued*

**Table 5**. (4)

| Pluton | Sample | Latitude  N/o | Longitude  E/o | Rock type | Age / Ma | Distance / km | Reference |
| --- | --- | --- | --- | --- | --- | --- | --- |
| Duolong Cu-Au deposit | DT13T12 | 32.88194 | 83.58778 | Diorite | 120.5 | 26 | 10 |
| Shilong pluton | B-2 | 33.56028 | 81.10944 | Granite | 113.5 | 45 | 5 |
| Rongma pluton SE Yibuchaka | L140-1 | 32.87167 | 86.76083 | Diorite | 149.7 | 30 | 14 |

**References Cited for Table 5**:

| [1] Chen, S.-H., Wang, B., Zhang, J.-R., Luo, X., Niu, J.-Z., Du, C.-F., and Wan, C., 2014, Lithogeochemical characteristics and Chronolgoy of Fuye granitic pluton from the Western Bangong-Nujiang metallogenic belt in China: Journal of East China Institute of Technology, v. 37, no. 1, p. 37-44. |
| --- |
| [2] Fan, J.-J., Li, C., Wu, H., Zhang, T.-Y., Wang, M., Chen, J.-W., and Xu, J.-X., 2016, Late Jurassic adakitic granodiorite in the Dong Co area, northern Tibet: Implications for subduction of the Bangong–Nujiang oceanic lithosphere and related accretion of the Southern Qiangtang terrane: Tectonophysics, v. 691, p. 345-361. |
| [3] Hao, L.-L., Wang, Q., Wyman, D. A., Ou, Q., Dan, W., Jiang, Z.-Q., Wu, F.-Y., Yang, J.-H., Long, X.-P., and Li, J., 2016, Underplating of basaltic magmas and crustal growth in a continental arc: Evidence from Late Mesozoic intermediate–felsic intrusive rocks in southern Qiangtang, central Tibet: Lithos, v. 245, p. 223-242. |
| [4] Kapp, P., DeCelles, P. G., Gehrels, G. E., Heizler, M., and Ding, L., 2007, Geological records of the Lhasa-Qiangtang and Indo-Asian collisions in the Nima area of central Tibet: Geological Society of America Bulletin, v. 119, no. 7-8, p. 917-933. |
| [5] Li, J. X., Qin, K. Z., Li, G. M., Richards, J. P., Zhao, J. X., and Cao, M. J., 2014a, Geochronology, geochemistry, and zircon Hf isotopic compositions of Mesozoic intermediate-felsic intrusions in central Tibet: Petrogenetic and tectonic implications: Lithos, v. 198-199, p. 77-91. |
| [6] Li, J.-X., Qin, K.-Z., Li, G.-M., Xiao, B., Zhao, J.-X., and Chen, L., 2016a, Petrogenesis of Cretaceous igneous rocks from the Duolong porphyry Cu-Au deposit, central Tibet: evidence from zircon U-Pb geochronology, petrochemistry and Sr-Nd-Pb-Hf isotope charateristics: Geological Journal, v. 51, p. 285-307. |
| [7] Li, J.-X., Qin, K.-Z., Li, G.-M., Xiao, B., Zhao, J.-X., Cao, M.-J., and Chen, L., 2013, Petrogenesis of ore-bearing porphyries from the Duolong porphyry Cu–Au deposit, central Tibet: Evidence from U–Pb geochronology, petrochemistry and Sr–Nd–Hf–O isotope characteristics: Lithos, v. 160-161, p. 216-227. |
| [8] Li, S.-M., Zhu, D.-C., Wang, Q., Zhao, Z., Zhang, L.-L., Liu, S.-A., Chang, Q.-S., Lu, Y.-H., Dai, J.-G., and Zheng, Y.-C., 2016b, Slab-derived adakites and subslab asthenosphere-derived OIB-type rocks at 156±2Ma from the north of Gerze, central Tibet: Records of the Bangong–Nujiang oceanic ridge subduction during the Late Jurassic: Lithos, v. 262, p. 456-469. |
| [9] Li, S.-M., Zhu, D.-C., Wang, Q., Zhao, Z.-D., Sui, Q.-L., Liu, S.-A., Liu, D., and Mo, X.-X., 2014b, Northward subduction of Bangong–Nujiang Tethys: Insight from Late Jurassic intrusive rocks from Bangong Tso in western Tibet: Lithos, v. 205, p. 284-297. |
| [10] Li, X.-K., Chen, J., Wang, R.-C., and Li, C., 2018, Temporal and spatial variations of Late Mesozoic granitoids in the SW Qiangtang, Tibet: Implications for crustal architecture, Meso-Tethyan evolution and regional mineralization: Earth-Science Reviews, v. 185, p. 374-396. |
| [11] Liu, D., Huang, Q., Fan, S., Zhang, L., Shi, R., and Ding, L., 2014, Subduction of the Bangong-Nujiang Ocean: Constraints from granites in the Bangong Co area, Tibet: Geological Journal, v. 49, no. 2, p. 188-206. |
| [12] Liu, D., Shi, R., Ding, L., Huang, Q., Zhang, X., Yue, Y., and Zhang, L., 2017, Zircon U–Pb age and Hf isotopic compositions of Mesozoic granitoids in southern Qiangtang, Tibet: Implications for the subduction of the Bangong–Nujiang Tethyan Ocean: Gondwana Research, v. 41, p. 157-172. |
| [13] Liu, H., Zhang, H., Li, G. M., Huang, X., and Xiao, W., 2016, Petrogenesis of the Early Cretaceous Qingcaoshan Strongly Peraluminous S-Type Granitic Pluton, Southern Qiangtang, Northern Tibet: Constraints from Whole-Rock Geochemistry and Zircon U-Pb Geochronology: Acta Scientiarum Naturalium Universitatis Pekinensis, v. 52, no. 5, p. 848-860. |
| [14] Ran, H., Wang, G.-H., Liang, X., Zheng, Y., and Duoji, J., 2015, The Late Jurassic diorite in Rongma area, southern Qiangtang terrane, Tibetan Plateau: Product of northward subduction of the Bangong Co-Nujiang River Tethys Ocean: Geological Bulletin of China, v. 34, no. 5, p. 815-825. |
| [15] Wu, H., Xie, C., Li, C., Wang, M., Fan, J., and Xu, W., 2016, Tectonic shortening and crustal thickening in subduction zones: Evidence from Middle–Late Jurassic magmatism in Southern Qiangtang, China: Gondwana Research, v. 39, p. 1-13. |
| [16] Yang, Z.-Y., Wang, Q., Yang, J.-H., Dan, W., Zhang, X.-Z., Ma, L., Qi, Y., Wang, J., and Sun, P., 2019, Petrogenesis of Early Cretaceous granites and associated microgranular enclaves in the Xiabie Co area, central Tibet: Crust-derived magma mixing and melt extraction: Lithos, v. 350-351, p. 105199. |
| [17] Zhang, T.-J., Chen, Y., and Li, Y., 2017, Zircon U-Pb Geochronology and Geochemistry Characteristics of the North Qingcaoshan Granodiorite in the Southern Margin of Qiangtang, Tibet, and their Metallogenic Signifcance: Acta Geologica Sinica, v. 91, no. 8, p. 1729-1742. |
| [18] Zhang, X.-Z., Wang, Q., Dong, Y.-S., Zhang, C., Li, Q.-Y., Xia, X.-P., and Xu, W., 2017, High-pressure granulite facies overprinting during the exhumation of eclogites in the Bangong-Nujiang suture zone, central Tibet: Link to flat-slab subduction: Tectonics, v. 36, p. 2918-2935. |
| [19] Zhang, Y.-X., Li, Z.-W., Yang, W.-G., Zhu, L.-D., Jin, X., Zhou, X.-Y., Tao, G., and Zhang, K.-J., 2017, Late Jurassic–Early Cretaceous episodic development of the Bangong Meso-Tethyan subduction: Evidence from elemental and Sr–Nd isotopic geochemistry of arc magmatic rocks, Gaize region, central Tibet, China: Journal of Asian Earth Sciences, v. 135, no. Supplement C, p. 212-242. |
| [20] Zhang, Z., Geng, Q.-R., Peng, Z.-M., Cong, F., and Guan, J.-L., 2011, Geochemistry and geochronology of the Caima granites in the western part of the Bangong-Nujiang metallogenic zone, Xizang (Tibet): Sedimentary Geology and Tethyan Geology, v. 31, no. 4, p. 86-96. |
| [21] Zhang, Z., Geng, Q.-R., Peng, Z.-M., Cong, F., and Guan, J.-L., 2015, Petrogenesis of Fuye pluton in Rutog, Tibet: zircon U-Pb dating and Hf isotopic constraints: Geological Bulletin of China, v. 34, no. 3-4, p. 262-273. |
| [22] Zheng, H., Zheng, Y.-Y., Xu, J., Wu, S., Guo, J., Gao, S.-B., and Ci, Q., 2018, Zircon U-Pb ages and petrogenesis of ore-bearing porphyry for Qiangcaoshan porphyry Cu-Au deposit, Tibet: Earth Science, v. 43, no. 8, p. 2858-2874. |
| [23] Zhu, X., Li, G., Chen, H., Ma, D., Zhang, H., Zhang, H., Liu, C., and Wei, L., 2017, Petrogenesis and metallogenic setting of porphyries of the Duobuza porphyry Cu–Au deposit, central Tibet, China: Ore Geology Reviews, v. 89, p. 858-875. |
